# Supplementary material for: Prognostic factors for mortality, intensive care unit and hospital admission due to SARS-CoV-2: a systematic review and meta-analysis of cohort studies in Europe
Source: PubMed Central journal article supplement — Eur Respir Rev. 2022 Nov 2;31(166):220098. doi: 10.1183/16000617.0098-2022 (PMC9724816; doi:10.1183/16000617.0098-2022), 2022-11-02

Contents

**APPENDIXES**.....2

**Appendix 1: Search strategies for identifying studies** .....2

**Appendix 2: Characteristics of the included studies** .....3

**Appendix 3. Risk of Bias and Quality appraisal**.....6

**Appendix 4.** .....7

***Figure 4a-b.* Forest plot showing the summary of available evidence regarding the association between prognostic factors and the composite outcome death or ICU admission due to COVID-19 within the community (a), and hospital setting (b).**.....7

**Appendix 5.** .....9

***Figure 5a-b.* Forest plot showing the summary of available evidence regarding the association between prognostic factors for mechanical ventilation due to COVID-19 among those from within the hospital (6a) and ICU (6b) setting.** .....9

## APPENDIXES

### Appendix 1: Search strategies for identifying studies

#### Database: Ovid MEDLINE(R) ALL <1946 to July 30, 2020>

|    |                                                                                                                                                                                                                                                                                                                                                                                                                                                                                                                                          |
|----|------------------------------------------------------------------------------------------------------------------------------------------------------------------------------------------------------------------------------------------------------------------------------------------------------------------------------------------------------------------------------------------------------------------------------------------------------------------------------------------------------------------------------------------|
| 1  | exp Coronavirus/ (22658)                                                                                                                                                                                                                                                                                                                                                                                                                                                                                                                 |
| 2  | exp Coronavirus Infections/ (22921)                                                                                                                                                                                                                                                                                                                                                                                                                                                                                                      |
| 3  | (Coronavir* or nCov or covid or covid-19 or Middle East Respiratory Syndrome or MERS or Severe Acute Respiratory Syndrome or SARS).ti,ab,kf. (55932)                                                                                                                                                                                                                                                                                                                                                                                     |
| 4  | 1 or 2 or 3 (60790)                                                                                                                                                                                                                                                                                                                                                                                                                                                                                                                      |
| 5  | (case control study or case control studies or clinical study or cohort analysis or cohort studies or correlational study or cross sectional studies or cross sectional study or epidemiologic studies or family study or follow up or followup studies or follow up studies or hospital based case control study or longitudinal studies or longitudinal study or observational study or population based case control study or prospective studies or prospective study or retrospective studies or retrospective study).sh. (2511702) |
| 6  | ((case or crosssectional or cross sectional or epidemiologic\$ or observational) adj (study or studies)) or (case adj (control\$ or report\$)) or cohort\$1 or cross sectional or followup\$ or follow up\$ or followed or longitudinal\$ or prospective\$ or retrospective\$.tw. (4120613)                                                                                                                                                                                                                                              |
| 7  | 5 or 6 (4920523)                                                                                                                                                                                                                                                                                                                                                                                                                                                                                                                         |
| 8  | 4 and 7 (7716)                                                                                                                                                                                                                                                                                                                                                                                                                                                                                                                           |
| 9  | 8 (7716)                                                                                                                                                                                                                                                                                                                                                                                                                                                                                                                                 |
| 10 | limit 9 to humans (3617)                                                                                                                                                                                                                                                                                                                                                                                                                                                                                                                 |
| 11 | limit 10 to yr="2020 -Current" (1815)                                                                                                                                                                                                                                                                                                                                                                                                                                                                                                    |
| 12 | 11 (1815)                                                                                                                                                                                                                                                                                                                                                                                                                                                                                                                                |
| 13 | limit 12 to english language (1660)                                                                                                                                                                                                                                                                                                                                                                                                                                                                                                      |

#### Database: Embase <1974 to 2020 July 30>

|    |                                                                                                                                                                                                                                                                                                                                                                                                                                                                                                                                          |
|----|------------------------------------------------------------------------------------------------------------------------------------------------------------------------------------------------------------------------------------------------------------------------------------------------------------------------------------------------------------------------------------------------------------------------------------------------------------------------------------------------------------------------------------------|
| 1  | exp coronavirus/ (16784)                                                                                                                                                                                                                                                                                                                                                                                                                                                                                                                 |
| 2  | exp coronavirus infections/ (17165)                                                                                                                                                                                                                                                                                                                                                                                                                                                                                                      |
| 3  | (Coronavir* or nCov or covid or Middle East Respiratory Syndrome or MERS or Severe Acute Respiratory Syndrome or SARS).ti,ab,tw. (58730)                                                                                                                                                                                                                                                                                                                                                                                                 |
| 4  | 1 or 2 or 3 (65543)                                                                                                                                                                                                                                                                                                                                                                                                                                                                                                                      |
| 5  | (case control study or case control studies or clinical study or cohort analysis or cohort studies or correlational study or cross sectional studies or cross sectional study or epidemiologic studies or family study or follow up or followup studies or follow up studies or hospital based case control study or longitudinal studies or longitudinal study or observational study or population based case control study or prospective studies or prospective study or retrospective studies or retrospective study).sh. (3757320) |
| 6  | ((case or crosssectional or cross sectional or epidemiologic\$ or observational) adj (study or studies)) or (case adj (control\$ or report\$)) or cohort\$1 or cross sectional or followup\$ or follow up\$ or followed or longitudinal\$ or prospective\$ or retrospective\$.tw. (6016403)                                                                                                                                                                                                                                              |
| 7  | 5 and 6 (2977800)                                                                                                                                                                                                                                                                                                                                                                                                                                                                                                                        |
| 8  | 4 and 7 (4206)                                                                                                                                                                                                                                                                                                                                                                                                                                                                                                                           |
| 9  | limit 8 to human (4027)                                                                                                                                                                                                                                                                                                                                                                                                                                                                                                                  |
| 10 | limit 9 to yr="2020 -Current" (2879)                                                                                                                                                                                                                                                                                                                                                                                                                                                                                                     |
| 11 | limit 10 to english language (2776)                                                                                                                                                                                                                                                                                                                                                                                                                                                                                                      |

## Appendix 2: Characteristics of the included studies

| Study ID                           | Area, Country                     | Setting at Enrollment | Study Design                  | Recruitment Dates        | Covid Diagnosis               | Follow-up Duration |
|------------------------------------|-----------------------------------|-----------------------|-------------------------------|--------------------------|-------------------------------|--------------------|
| Ponziani et al, 2020 (13)          | Italy, Rome                       | Hospital              | Retrospective cohort          | 06/03 – 16/04/20         | Nasopharyngeal Swab/RT-PCR    | Hospitalisation    |
| Chew et al, 2021 (100)             | Sweden, Multicenter               | ICU                   | Registry based cohort         | 06/03 – 06/05/20         | PCR                           | 30-day             |
| Fresan et al, 2021 (14)            | Spain, Navarra                    | Hospital              | Cohort study                  | 03 – 05/20               | PCR/Antibody Test             | 30-day             |
| Dirim et al, 2021 (15)             | Instabul, Turkey                  | Hospital              | Propensity-matched cohort     | 01/02 & 14/05/20         | PCR                           | Hospitalisation    |
| Parikh et al, 2020 (95)            | US, Boston                        | ICU                   | Cohort study                  | 01/03 – 01/05/20         | PCR                           | Hospitalisation    |
| Pablos et al, 2020 (16)            | Spain, Multicenter                | Hospital              | Matched cohort study          | Up to 17/04/20           | PCR                           | Hospitalisation    |
| Diez et al, 2021 (17)              | Spain, Multicenter                | Hospital              | Retrospective cohort          | Up to 30/06/20           | PCR                           | Hospitalisation    |
| Pineiro et al, 2021 (96)           | Spain, Barcelona                  | ICU                   | Cohort                        | 25/03 – 21/04/20         | PCR                           | 35.5 days          |
| Blomaard et al, 2021 (18)          | Netherlands, Multicenter          | Hospital              | Cohort                        | Between 02/20 & 05/20    | Clinical criteria or PCR      | Hospitalisation    |
| Biscarini et al, 2020 (19)         | Italy, Milan                      | Hospital              | Retrospective cohort          | 21/02 & 31/03/20         | PCR                           | 30-day             |
| Fond et al, 2021 (20)              | France, nationwide                | Hospital              | population-based cohort study | 01/02 & 09/06/20         | ICD Classification            | Hospitalisation    |
| Galiero et al, 2020 (21)           | Italy, Campania Region            | Hospital              | Cohort                        | 03 – 06/20               | PCR                           | Hospitalisation    |
| Villalba et al, 2021 (22)          | Spain, Multicenter                | Hospital              | Retrospective cohort          | 15/03 – 14/04            | PCR                           | Hospitalisation    |
| Thomson et al, 2020 (98)           | UK, London                        | ICU                   | Cohort                        | 03/20 – 05/20            | PCR                           | At least 28-days   |
| Ciardullo et al, 2021 (23)         | Italy, Lombardy                   | Hospital              | Cohort                        | 22/02 & 15/05/20         | PCR                           | Hospitalisation    |
| Bernard et al, 2021 (24)           | France, Nationwide                | Hospital              | Cohort                        | 01/03 – 30/04/20         | ICD Classification            | Hospitalisation    |
| Fadini et al, 2020 (25)            | Italy, Padova                     | Hospital              | Cohort                        | 21/02 & 20/04/20         | PCR                           | Hospitalisation    |
| McGurnaghan et al, 2021 (26)       | Scotland, Nationwide              | Hospital              | Cohort                        | 01/03 -31/07/20          | PCR and/or ICD Classification | Hospitalisation    |
| Mallet et al, 2021 (27)            | France, Nationwide                | Hospital              | Registry based cohort         | 01/01 – 31/12/20         | ICD Classification            | 30 days            |
| San Roman et al, 2020 (28)         | Spain, Valladolid                 | Hospital              | Cohort                        | Between 15/03 & 11/04/20 | Rt-PCR                        | Hospitalisation    |
| Oetjens et al, 2020 (82)           | USA, Pennsylvania                 | Community             | Registry based cohort         | Between 07/03 & 19/05/20 | PCR                           |                    |
| Guerra Veloz et al, 2021 (29)      | Spain, Sevilla                    | Hospital              | Cohort                        | 23/03 – 30/04/20         | RT-PCR                        | Hospitalisation    |
| Angeli et al, 2021 (30)            | Italy, Lombardy                   | Hospital              | Cohort                        | 23/02 – 22/05/20         | PCR                           | Hospitalisation    |
| Chavarot et al, 2021 (31)          | France, 3 centers                 | Hospital              | Case control                  | 09/03/20 & 02/05/20      | PCR                           | 30-day             |
| Valdivielso-More et al, 2021 (32)  | Spain, Barcelona                  | Hospital              | Case control                  | 02 – 04/20               | PCR                           | 30-day             |
| Miarons et al, 2021 (33)           | Spain, Barcelona                  | Hospital              | Case control                  | 11/03 - 25/04/20         | PCR                           | 28-day             |
| Geretti et al, 2021 (34)           | UK, 207                           | Hospital              | Cohort                        | 04/06 – 18/06/20         | PCR                           | 28-day             |
| Sarmiento-Monroy et al, 2021 (35)  | Spain, Barcelona- Hospital clinic | Hospital              | Cohort study                  | 1/03 – 29/05/20          | PCR or Probable COVID         | Hospitalisation    |
| Xu et al, 2021 (36)                | Sweden, Stocholm                  | Hospital              | Cohort study                  | 01/03 – 15/06/20         | PCR or Symptoms/CT            | Hospitalisation    |
| Neumann-Podczaska et al, 2020 (37) | Poland, Poznan                    | Hospital              | Cohort study                  | 12/03 – 05/04/20         | PCR                           | 60-day             |

|                                     |                                     |                    |                                   |                  |                            |                                       |
|-------------------------------------|-------------------------------------|--------------------|-----------------------------------|------------------|----------------------------|---------------------------------------|
| Maddaloni et al, 2020 (38)          | Italy, Rome                         | Hospital           | Retrospective cohort              | 15/05/20         | PCR                        | Hospitalisation                       |
| Bellan et al, 2020 (39)             | Italy, Eastern Piedmont (4 centers) | Hospital           | Cohort                            | 01/03 -28/04/20  | PCR                        | Hospitalisation                       |
| Kaeuffer et al, 2020 (40)           | France, Stasbourg                   | Hospital           | Prospective cohort                | 03/20            | PCR                        | 7 days                                |
| Sutter et al, 2021 (41)             | France, 24 centers                  | Hospital           | Retrospective cohort              | 26/02 – 20/04/20 | PCR                        | Hospitalisation                       |
| Kjeldsen et al, 2021 (42)           | Denmark, National registry          | Hospital           | Retrospective cohort              | 01/03 – 30/10/20 | ICD Classification         | 30-day                                |
| Czernichow et al, 2020 (43)         | France, Paris                       | Hospital           | Cohort                            | 01/02 – 30/04/20 | PCR                        | 30-day                                |
| Attaoui et al, 2021 (83)            | Denmark, National Registry          | Community          | Population based cohort           | 28/01 -15/09/20  | PCR                        | Median 5.1 months                     |
| Joharatnam-Hogan et al, 2020 (44)   | UK, London                          | Hospital           | Case control from 2 cohorts       | 01/03 – 30/04/20 | PCR                        | Hospitalisation                       |
| De Giorgi et al, 2020 (45)          | Italy, Ferrara                      | Hospital           | Retrospective cohort              | 15/03 – 15/04/20 | PCR                        |                                       |
| Strausz et al, 2021 (84)            | Finland, Nationwide                 | Community          | Retrospective cohort              | Until 30/10/20   | ICD Classification         |                                       |
| Siepmann et al, 2021 (46)           | Germany, Multicenter                | Hospital           | Retrospective cohort              | 01/03 – 15/04/20 | PCR                        |                                       |
| Vena et al, 2020 (47)               | Italy, Genoa                        | Hospital           | Retrospective cohort              | 25/02 – 25/03/20 | PCR                        | 25 days                               |
| De Rosa et al, 2021 (48)            | Italy, Piedmont                     | Hospital           | Retrospecti registry based cohort | 27/02 – 25/06/20 | PCR                        | 7 days                                |
| Telle et al, 2021 (85)              | Norway, Nationwide                  | Community/Hospital | Registry base cohort              | 01/01 – 20/06/20 | PCR                        | Hospitalisation                       |
| Khawaja et al, 2021 (49)            | UK, London, Multicenter             | Hospital           | Retrospective cohort              | 03/20 – 07/04/20 | PCR                        | Hospitalisation                       |
| Gálvez-Barrón et al, 2021 (50)      | Spain, Barcelona, Multicenter       | Hospital           | Prospective cohort                | 12/03 – 02/05/20 | PCR                        | Hospitalisation                       |
| Anastasiou et al, 2020 (51)         | Germany, Essen                      | Hospital           | Prospective cohort                | 03/03 – 14/05/20 | PCR                        | Hospitalisation                       |
| Forlano et al, 2020 (52)            | UK, London                          | Hospital           | Retrospective cohort              | 25/02 – 05/04/20 | PCR                        | 60 days                               |
| Al-Salameh et al, 2021 (53)         | France, Amiens                      | Hospital           | Prospective cohort                | Until 21/04/20   | PCR                        | Hospitalisation or until 1st May      |
| Varela Rodriguez et al, 2021 (54)   | Spain, Madrid                       | Hospital           | Retrospective cohort              | 25/02 & 04/09/20 | PCR                        | February 25th and September 4th, 2020 |
| Orsucci et al, 2021 (55)            | Italy, Tuscany                      | Hospital           | Retrospective cohort              | 03 – 05/20       | PCR or Clinicoradiological |                                       |
| Vanni et al, 2021 (56)              | Italy, Rome                         | Hospital           | Retrospective cohort              | 01/03 – 30/04/20 | PCR or High Likely         |                                       |
| Rodriguez-Gonzalez et al, 2021 (57) | Spain, Madrid                       | Community/Hospital | Prospective cohort                | 1–24/03/20       | PCR                        | Until 10 May                          |
| Siso-Almirall et al, 2020 (92)      | Spain, Barcelona, Multicenter       | Community/Hospital | Retrospective observational study | 29/02 – 04/04/20 | PCR                        |                                       |
| Linares et al, 2021 (58)            | Spain, Barcelona                    | Spain, Barcelona   | Prospective cohort                | 06/03 – 24/05/20 | PCR                        | 68 days                               |
| Rey et al, 2020 (59)                | Spain, Madrid                       | Spain, Madrid      | Prospective cohort                | 01/03 -20/04/20  | PCR                        | 59 days                               |
| Vanhems et al, 2021 (60)            | France, Lyon                        | Hospital           | Prospective cohort                | 08/02 – 24/04/20 | PCR                        |                                       |
| De Vito et al, 2020 (61)            | Italy, Sardinia                     | Hospital           | Retrospective cohort              | 08/03 – 08/04/20 | PCR                        | 30 days                               |
| Cipriani et al, 2021 (62)           | Italy, Padova                       | Hospital           | Prospective cohort                | 26/02 – 21/03/20 | PCR                        |                                       |
| Al-Salameh et al, 2021 (63)         | France, Amiens                      | Hospital           | Retrospective cohort              | Until 21/04/20   | PCR                        | until May 1, 2020.                    |
| Gómez-Belda et al, 2021 (64)        | Spain, Valencia                     | Hospital           | Retrospective cohort              | 11/03 – 28/04/20 | PCR or Serology            | Hospitalisation                       |
| Smati et al, 2021 (65)              | France, Multicenter Mationwide      | Hospital           | Retrospective cohort              | 10/03 – 10/04/20 | PCR or Clinicoradiological | 7 days                                |
| Fresan et al, 2021 (101)            | Spain, Navarra                      | Community          | Cohort study                      | 03/20 – 31/04/20 | PCR or Serology            | Hospitalisation                       |
| Livingston et al, 2020 (66)         | UK, London Multicenter              | Hospital           | Retrospective observational study | 01/03 & 30/04/20 | PCR or High Likely         | Hospitalisation                       |
| Otero et al, 2021 (67)              | Spain, Valladolid                   | Hospital           | Prospective cohort                | 01/04 – 31/04/20 | PCR                        | 28 days                               |
| Marengoni et al, 2020 (68)          | Italy, Brescia                      | Hospital           | Retrospective cohort              | 08/03 – 17/04/20 | PCR                        | Hospitalisation                       |
| Welch et al, 2021 (69)              | International, Multicenter          | Hospital           | Prospective cohort                |                  | PCR or Clinicoradiological | Hospitalisation                       |
| Yordanov et al, 2021 (86)           | France, Paris                       | Community          | Prospective cohort                | 09/03 - 11/08/20 | PCR or High Likely         | 30 days                               |

|                                   |                                                                                                                                                                                                        |                                                                                                      |                                    |                         |                            |                 |
|-----------------------------------|--------------------------------------------------------------------------------------------------------------------------------------------------------------------------------------------------------|------------------------------------------------------------------------------------------------------|------------------------------------|-------------------------|----------------------------|-----------------|
| García-Guimaraes et al, 2021 (70) | Spain, Barcelona                                                                                                                                                                                       | Hospital                                                                                             | Prospective cohort                 | 27/02 – 07/04/20        | PCR                        | 28 days         |
| Trapani et al, 2021 (93)          | Italy, National                                                                                                                                                                                        | Community/Hospital                                                                                   | Registry based cohort              | 21/02 – 22/06/20        | PCR                        | 90 days         |
| Novelli et al, 2021 (71)          | Italy, Bergamo                                                                                                                                                                                         | Hospital                                                                                             | Retrospective cohort               | 23/02 & 14/03/20        | PCR                        | 28 days         |
| Waldman et al, 2021 (94)          | International, Multicenter                                                                                                                                                                             | Community/Hospital                                                                                   | Registry based cohort              | 20/04-20/08/20          | PCR or Clinicoradiological | 17 days         |
| Bloom et al, 2021 (72)            | UK, Nationwide                                                                                                                                                                                         | Hospital                                                                                             | Registry based cohort              | 17/01 & 03/08/20        | PCR or High Likely         | Hospitalisation |
| Bonifazi et al, 2021 (73)         | International, Multicenter                                                                                                                                                                             | Hospital                                                                                             | Retrospective cohort               | 28/02 & 15/05/20        | PCR or Clinicoradiological | Hospitalisation |
| Grandbastien et al, 2020 (74)     | France, Stasbourg                                                                                                                                                                                      | Hospital                                                                                             | Retrospective cohort               | 04/03/20 & 06/04/20     | PCR or Clinicoradiological | Hospitalisation |
| Kolhe et al, 2020 (75)            | UK, Multicenter                                                                                                                                                                                        | Hospital                                                                                             | Retrospective cohort               | 5/03/20 & 12/05/20      | PCR                        | up to 67 days   |
| Maquet et al, 2020 (76)           | France, Toulouse                                                                                                                                                                                       | Hospital                                                                                             | Prospective + retrospective cohort | 11/03 – 20/04/20        | PCR                        | 14 days         |
| Hamer et al, 2020 (120)           | UK, Nationwide                                                                                                                                                                                         | Community                                                                                            | Registry based cohort              | 16/03/20 up to 26/04/20 | PCR                        |                 |
| Spironi et al, 2021 (121)         | Italy, Novara                                                                                                                                                                                          | Hospital                                                                                             |                                    | 02/20 -05/20            | PCR                        | 30 days         |
| Hugo et al, 2021 (122)            | Germany, Multicenter                                                                                                                                                                                   | Hospital                                                                                             |                                    | Until 31/5/20           | PCR                        | Hospitalisation |
| Göttinger et al, 2020 (88)        | Europe(Austria, Belgium, Bulgaria, Croatia, Denmark, Estonia, Germany, Greece, Hungary, Ireland, Italy, Lithuania, Norway, Portugal, Slovakia, Slovenia, Spain, Sweden, Switzerland, Turkey and the UK | 82 Participating health-care institutions (The Pediatric Tuberculosis Network European Trials Group) | Cohort                             | 1/4 - 24/4/20           | PCR                        | Unclear         |
| De Smet et al, 2021 (81)          | Bonheiden, Belgium                                                                                                                                                                                     | Imelda Hospital, Bonheiden, Belgium                                                                  | Retrospective cohort               | 12/3 - 30/4/21          | PCR                        | Not reported    |
| Rottoli et al, 2020 (79)          | Bologna, Italy                                                                                                                                                                                         |                                                                                                      | Retrospective cohort               | 1/3 - 20/4/20           | PCR                        | At least 7 days |
| Poblador-Plou et al, 2020 (89)    | Aragon, Spain                                                                                                                                                                                          |                                                                                                      | Retrospective cohort               | 4/3 - 17/4/20           | PCR                        | ≥ 30 days       |
| Simonnet et al, 2020 (99)         | Lille, France                                                                                                                                                                                          |                                                                                                      | Cohort                             | 27/2 - 5/4/20           | PCR                        | >= 1 day        |
| Deiana et al, 2020 (90)           | Sardinia, Italy                                                                                                                                                                                        |                                                                                                      | Retrospective cohort               | Up to 21/4/20           | Unclear                    | Not reported    |
| Bravi et al, 2020 (91)            | Italy                                                                                                                                                                                                  |                                                                                                      | Retrospective cohort               | 2/4 - 24/4/20           | PCR                        | median: 24 days |
| García-Azorín et al, 2020 (80)    | Valladolid, Spain                                                                                                                                                                                      | Clinic University Hospital, Valladolid, Spain                                                        | Retrospective cohort               | 8/3 – 11/4/20           | PCR                        | >= 10 days      |
| Lobo Valbuena et al, 2021 (97)    | Spain, Madrid                                                                                                                                                                                          | ICU                                                                                                  | Retrospective cohort               | 05/03 & 07/05/20        | PCR                        | Hospitalization |

### Appendix 3. Risk of Bias and Quality appraisal

The JBI critical appraisal tool for cohort studies consists of eleven questions evaluating the appropriateness of the sample used in each study, the recruitment methods, the measurements of exposures and outcomes, the identification and managing strategies for confounding factors, the follow up process and the statistical analysis. For the purposes of this study, we accepted as accurate exposures (e.g., age, sex, comorbidities) and outcome measures documented by the treated clinician or captured from health databases. We considered age, gender and recruitment setting (a surrogate measure of baseline COVID-19 severity) the most important confounding factors. All the included studies clearly grouped patients based on the recruitment setting. Therefore, we scored high risk of bias for studies that were not at least age and gender adjusted (Q5). Moreover, since the aim of our study is to assess the risk factors for adverse COVID-19 outcomes among people who may contract the disease in the future, we considered that adjustment for presenting clinical characteristics associated with COVID-19 (e.g., symptoms, oxygen saturation etc) would be a source confounding in our study. Therefore, in such cases, we scored high risk of bias in the last domain of the instrument (Q11).

Studies that provided appropriately adjusted analyses for some but not all variables were judged to be at low risk of bias for confounding. However, we noted which variables were adjusted and conducted a sensitivity analysis only including adjusted variables, the results of which are presented in the main text of the manuscript. Finally, we considered 2 weeks to be adequate follow-up to capture the outcomes of interest, as the median length of hospital stay varied between 5-13 days within the included studies, and the median length of ICU admission between 7-9 days. Therefore, 2 weeks of follow-up would suffice to capture the outcomes of significantly more than half of the participants. Studies only including patients that were discharged or deceased were also judged to be at low risk of bias.

#### JBI critical appraisal tool for cohort studies

|     |                                                                                                            |
|-----|------------------------------------------------------------------------------------------------------------|
| Q1  | Were the two groups similar and recruited from the same population?                                        |
| Q2  | Were the exposures measured similarly to assign people to both exposed and unexposed groups?               |
| Q3  | Was the exposure measured in a valid and reliable way?                                                     |
| Q4  | Were confounding factors identified?                                                                       |
| Q5  | Were strategies to deal with confounding factors stated?                                                   |
| Q6  | Were the groups/participants free of the outcome at the start of the study (or at the moment of exposure)? |
| Q7  | Were the outcomes measured in a valid and reliable way?                                                    |
| Q8  | Was the follow up time reported and sufficient to be long enough for outcomes to occur?                    |
| Q9  | Was follow up complete, and if not, were the reasons to loss to follow up described and explored?          |
| Q10 | Were strategies to address incomplete follow up utilized?                                                  |
| Q11 | Was appropriate statistical analysis used?                                                                 |

Appendix 4.

Figure 4a-b. Forest plot showing the summary of available evidence regarding the association between prognostic factors and the composite outcome death or ICU admission due to COVID-19 within the community (a), and hospital setting (b).

4.a Prognostic factors related to the composite outcome of Death or ICU admission within the community setting

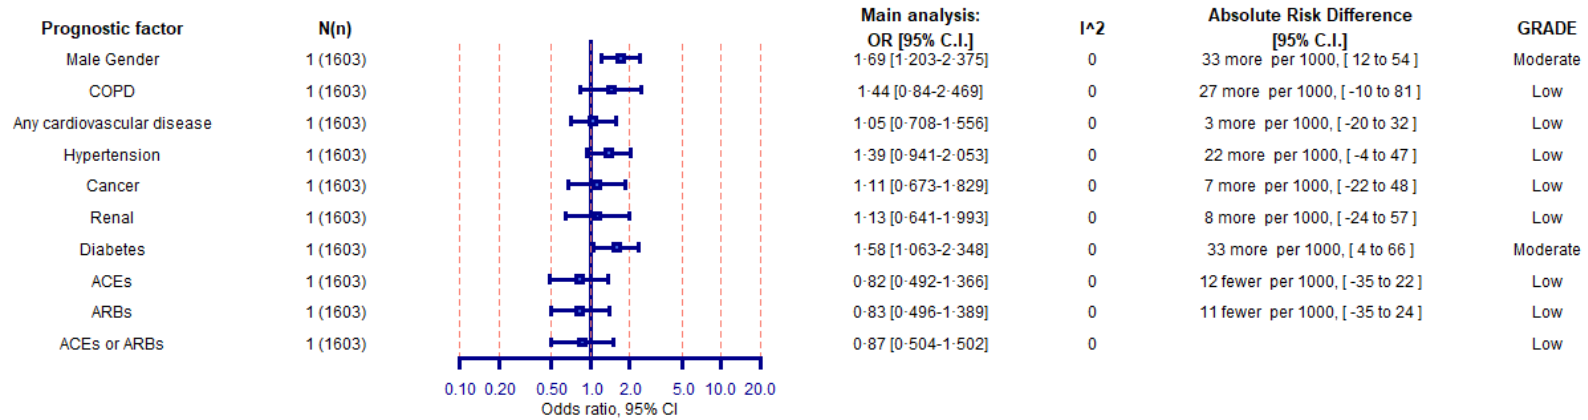

#### 4.b Prognostic factors related to the composite outcome of death or ICU admission within the hospital setting

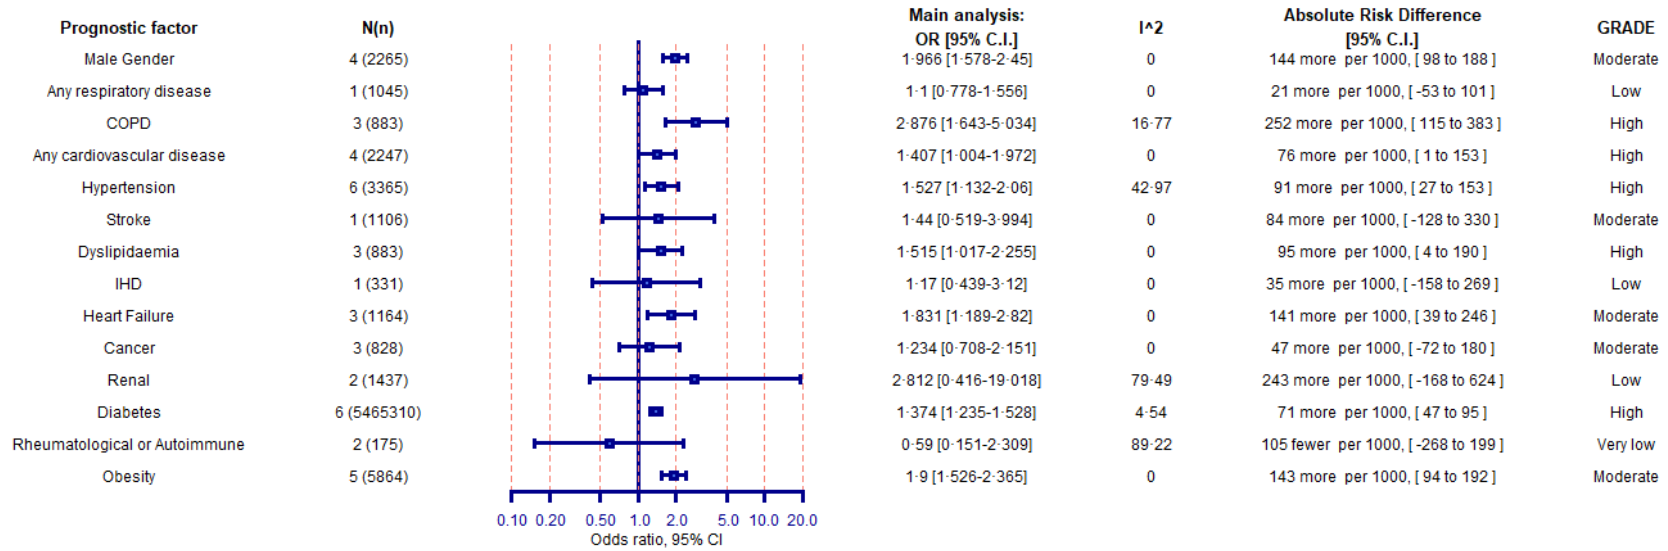



## Appendix 5.

**Figure 5a-b.** Forest plot showing the summary of available evidence regarding the association between prognostic factors for mechanical ventilation due to COVID-19 among those from within the hospital (6a) and ICU (6b) setting.

### 5a. Prognostic factors and mechanical ventilation within the hospital setting

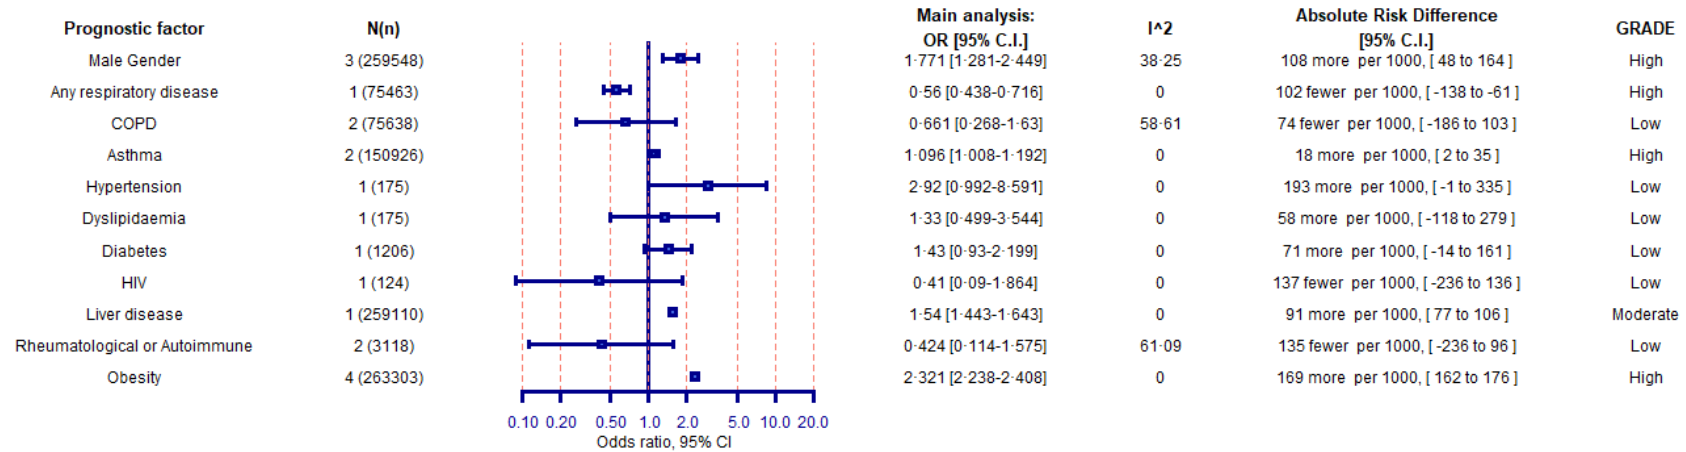

### 5b. Prognostic factors and mechanical ventilation within the ICU setting

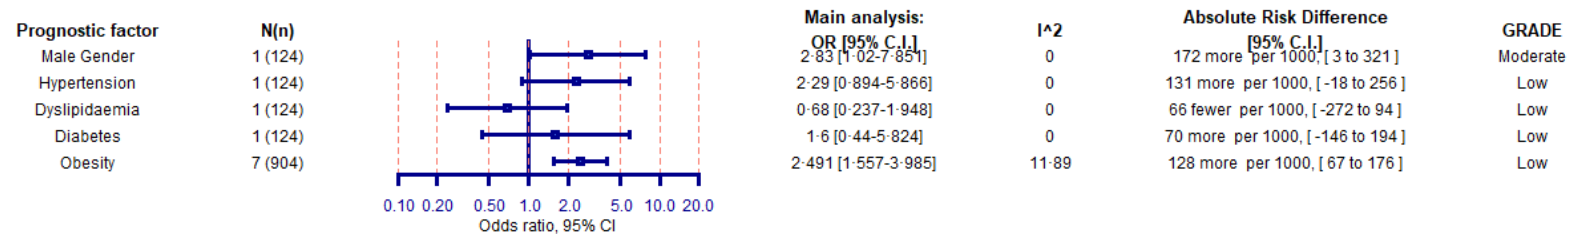

Supplement: ERR-0098-2022.SUPPLEMENT.pdf [file ERR-0098-2022.SUPPLEMENT.pdf]
